# Supplementary material for: Rescue of Infectious Sindbis Virus by Yeast Spheroplast-Mammalian Cell Fusion
Source: PubMed Central journal article supplement (PMC8066160; doi:10.3390/v13040603), 2021-04-01
Supplement: viruses-13-00603-s001.pdf [file viruses-13-00603-s001.pdf]

Figure S1

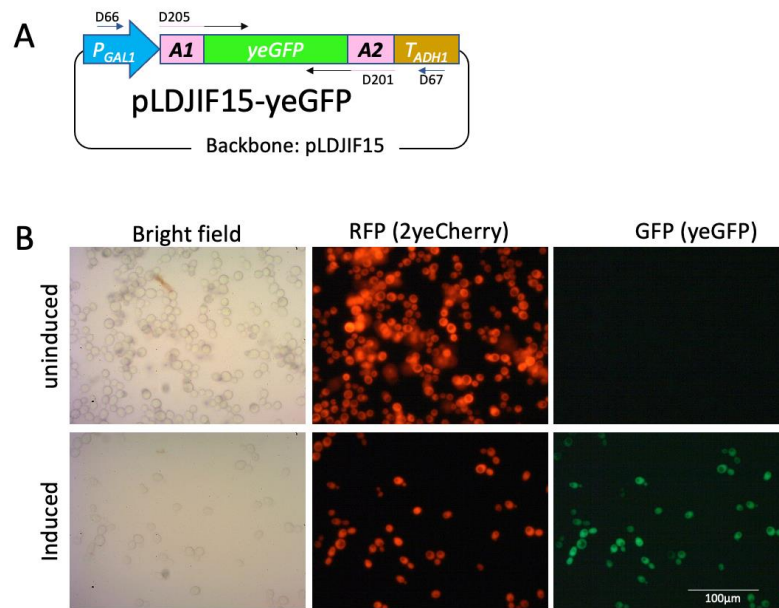

**Figure S1.** pLDJIF15 is a vector for galactose induced protein expression. **(A.)** A schematic of pLDJIF15-yeGFP. Not drawn to scale. A codon-optimized GFP for yeast expression (yeGFP) was amplified with primers D205 and D201 and inserted between Adapter 1 and 2 using Gibson Assembly. See GenBank files in supplementary data for sequences. **(B.)** Fluorescence micrographs of fusion experiments. yLDJIF22 (W303 $\alpha$  transformed with pLDJIF15-yeGFP) was grown overnight in  $-TRP$  medium was used to inoculate  $-TRP$  medium (uninduced) or YPG medium (induced) for 5 hours at 30°C.

Figure S2

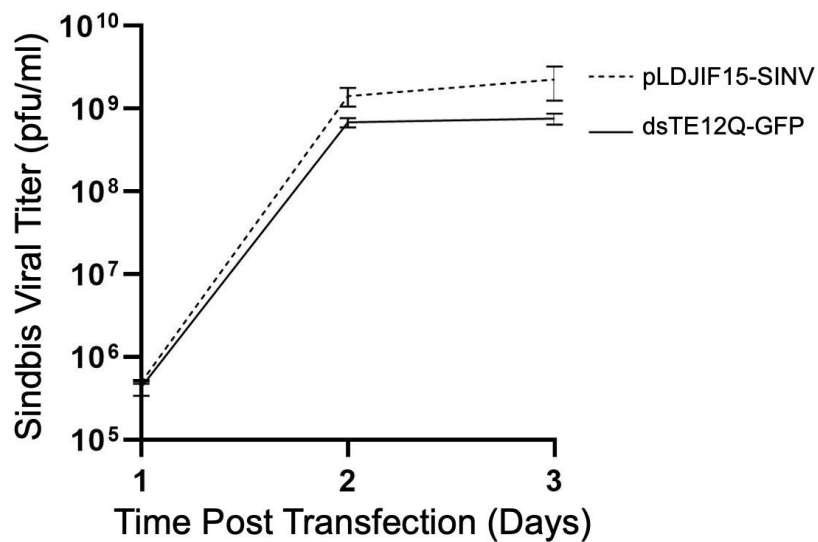

**Figure S2.** pLDJIF15-SINV and dsTE12Q-GFP rescue Sindbis viral particles via transfection of plasmid DNA. dsTE12Q-GFP is the Parental SINV cDNA construct
